# Supplementary material for: Evaluation of Length of Stay, Care Volume, In-Hospital Mortality, and Emergency Readmission Rate Associated With Use of Diagnosis-Related Groups for Internal Resource Allocation in Public Hospitals in Hong Kong
Source: PubMed Central journal article supplement (PMC8817200; doi:10.1001/jamanetworkopen.2021.45685), 2022-02-04
Supplement: jamanetwopen-e2145685-s001.pdf [file jamanetwopen-e2145685-s001.pdf]

## Supplementary Online Content

Wu Y, Fung H, Shum HM, et al. Evaluation of length of stay, care volume, in-hospital mortality, and emergency readmission rate associated with use of diagnosis-related groups for internal resource allocation in public hospitals in Hong Kong. *JAMA Netw Open*. 2022;5(2):e2145685.  
doi:10.1001/jamanetworkopen.2021.45685

**eTable 1.** Changes in Outcome Variables Associated With the Introduction and Discontinuation of DRGs by Age Group

**eTable 2.** Changes in Outcome Variables Associated With the Introduction and Discontinuation of DRGs by Disease Group

**eTable 3.** Changes in Outcome Variables Associated With the Introduction and Discontinuation of DRGs, Excluding Transition Periods After Policy Changes

**eTable 4.** Changes in Outcome Variables Associated With the Introduction and Discontinuation of DRGs, Using Alternative Approaches to Estimate Patients' Disease Burden

**eTable 5.** Changes in Volume of Care Associated With the Introduction and Discontinuation of DRGs, Population Number of Admissions on Mega-Cluster Level

This supplementary material has been provided by the authors to give readers additional information about their work.

## Supplement

**eTable 1. Changes in outcome variables associated with the introduction and discontinuation of DRGs by age group**

|                                      | Introduction of DRGs                       |                                             | Discontinuation of DRGs                    |                                             |
|--------------------------------------|--------------------------------------------|---------------------------------------------|--------------------------------------------|---------------------------------------------|
|                                      | Step change estimated coefficients [95%CI] | Slope change estimated coefficients [95%CI] | Step change estimated coefficients [95%CI] | Slope change estimated coefficients [95%CI] |
| <b>Patients aged 45–64 years</b>     |                                            |                                             |                                            |                                             |
| Length of stay                       | -0.0271**<br>[-0.0364, -0.0177]            | 0.0012***<br>[0.007,0.0017]                 | 0.0139**<br>[0.0054, 0.0224]               | 0.0019***<br>[0.0014, 0.0024]               |
| Average monthly admissions per month | 0.0343***<br>[0.0283, 0.0402]              | -0.0007***<br>[-0.0010, -0.0004]            | -0.0219***<br>[-0.0273, -0.0165]           | -0.0018***<br>[-0.0021, -0.0016]            |
| In-hospital mortality (%)            | -0.1076***<br>[-0.1636, -0.0515]           | -0.0005<br>[-0.0033, 0.0023]                | -0.0068<br>[-0.0611, 0.0475]               | 0.0050***<br>[0.0021, 0.0078]               |
| Emergency readmission (%)            | -0.0549***<br>[-0.0785, -0.0314]           | -0.0021***<br>[-0.0032, -0.0009]            | 0.0003<br>[-0.0210, 0.0216]                | 0.0004<br>[-0.0007, 0.0015]                 |
| <b>Patients aged 65+ years</b>       |                                            |                                             |                                            |                                             |
| Length of stay                       | -0.0105***<br>[-0.0172, -0.0039]           | 0.0010***<br>[0.0006, 0.0013]               | 0.0066***<br>[0.0003, 0.0129]              | 0.0030***<br>[0.0027, 0.0034]               |
| Average monthly admissions per month | 0.0258***<br>[0.0209, 0.0307]              | -0.0025***<br>[-0.0028, -0.0023]            | -0.0161***<br>[-0.0207, -0.0115]           | -0.0031***<br>[-0.0034, -0.0029]            |
| In-hospital mortality (%)            | -0.0295*<br>[-0.0538, -0.0053]             | 0.0002<br>[-0.0010, 0.0014]                 | 0.0012<br>[-0.0223, 0.0247]                | 0.0024***<br>[0.0011, 0.0036]               |
| Emergency readmission (%)            | -0.0170**<br>[-0.0293, -0.0047]            | -0.0017***<br>[-0.0023, -0.0011]            | -0.0044<br>[-0.0159, 0.0071]               | -0.0002<br>[-0.0008, 0.0004]                |

\*\*\*  $P < .001$ ; \*\*  $P < .01$ ; \*  $P < .05$ .

**eTable 2. Changes in outcome variables associated with the introduction and discontinuation of DRGs by disease group**

|                                    | Introduction of DRGs                        |                                              | Discontinuation of DRGs                     |                                              |
|------------------------------------|---------------------------------------------|----------------------------------------------|---------------------------------------------|----------------------------------------------|
|                                    | Step change estimated coefficients [95% CI] | Slope change estimated coefficients [95% CI] | Step change estimated coefficients [95% CI] | Slope change estimated coefficients [95% CI] |
| <b>Congestive heart failure</b>    |                                             |                                              |                                             |                                              |
| Length of stay                     | -0.0267*                                    | 0.0014*                                      | -0.0181                                     | 0.0025**                                     |
|                                    | [-0.0528, -0.0007]                          | [0.0000, 0.0028]                             | [-0.0136, 0.0498]                           | [0.0009, 0.0042]                             |
| In-hospital mortality (%)          | -0.1934**                                   | -0.0015                                      | 0.0472                                      | 0.0009                                       |
|                                    | [-0.3342, -0.0527]                          | [-0.0087, 0.0056]                            | [-0.1006, 0.1951]                           | [-0.0069, 0.0087]                            |
| Emergency readmission (%)          | -0.0101                                     | -0.0015                                      | -0.0373                                     | 0.0012                                       |
|                                    | [-0.0617, 0.0416]                           | [-0.0041, 0.0011]                            | [-0.0886, 0.0140]                           | [-0.0015, 0.0039]                            |
| <b>Acute myocardial infarction</b> |                                             |                                              |                                             |                                              |
| Length of stay                     | -0.0858***                                  | -0.0025***                                   | 0.0050                                      | 0.0051***                                    |
|                                    | [-0.1248, -0.0467]                          | [-0.0044, -0.0006]                           | [-0.0290, 0.0390]                           | [0.0033, 0.0070]                             |
| In-hospital mortality (%)          | -0.2107***                                  | -0.0048                                      | -0.1305**                                   | 0.0062*                                      |
|                                    | [-0.3177, -0.1037]                          | [-0.0100, 0.0005]                            | [-0.2273, -0.0338]                          | [0.0011, 0.0113]                             |
| Emergency readmission (%)          | -0.0279                                     | -0.0033                                      | 0.0331                                      | -0.0022                                      |
|                                    | [-0.1577, 0.1019]                           | [-0.0095, 0.0030]                            | [-0.0649, 0.1311]                           | [-0.0074, 0.0030]                            |
| <b>Pneumonia</b>                   |                                             |                                              |                                             |                                              |
| Length of stay                     | -0.0176                                     | 0.0018***                                    | 0.0011                                      | 0.0036***                                    |
|                                    | [-0.0384, 0.0032]                           | [-0.0028, -0.0007]                           | [-0.0257, 0.0279]                           | [0.0022, 0.0050]                             |
| In-hospital mortality (%)          | -0.0614*                                    | -0.0003                                      | 0.0429                                      | 0.0061***                                    |
|                                    | [-0.1119, -0.0109]                          | [-0.0029, 0.0022]                            | [-0.0037, 0.0895]                           | [0.0036, 0.0085]                             |
| Emergency readmission (%)          | 0.0421                                      | -0.0015                                      | 0.0114                                      | 0.0005                                       |
|                                    | [-0.0053, 0.0895]                           | [-0.0039, 0.0009]                            | [-0.0322, 0.0550]                           | [-0.0018, 0.0028]                            |
| <b>Cerebrovascular disease</b>     |                                             |                                              |                                             |                                              |
| Length of stay                     | -0.1265***                                  | -0.0025***                                   | 0.0066*                                     | 0.0030***                                    |
|                                    | [-0.1649, -0.0882]                          | [-0.0045, -0.0005]                           | [0.0003, 0.0129]                            | [0.0027, 0.0034]                             |
| In-hospital mortality (%)          | -0.0263                                     | -0.0040                                      | 0.0200                                      | 0.0081***                                    |
|                                    | [-0.1073, 0.0547]                           | [-0.0081, 0.0000]                            | [-0.0645, 0.1045]                           | [0.0037, 0.0125]                             |
| Emergency readmission (%)          | -0.0421                                     | -0.0064**                                    | 0.0062                                      | 0.0005                                       |
|                                    | [-0.1254, 0.0411]                           | [-0.0106, -0.0022]                           | [-0.0763, 0.0886]                           | [-0.0038, 0.0048]                            |
| <b>Hip fracture</b>                |                                             |                                              |                                             |                                              |
| Length of stay                     | -0.0170*                                    | -0.0002                                      | 0.0352***                                   | 0.0044***                                    |
|                                    | [-0.0429, -0.0089]                          | [-0.0011, 0.0015]                            | [0.0161, 0.0543]                            | [0.0033, 0.0054]                             |
| In-hospital mortality (%)          | 0.0964                                      | -0.0118                                      | 0.0927                                      | 0.0154                                       |
|                                    | [-0.2022, 0.3949]                           | [-0.0270, 0.0034]                            | [-0.2474, 0.4328]                           | [-0.0019, 0.0328]                            |
| Emergency readmission (%)          | -0.1054                                     | -0.0028                                      | 0.0210                                      | 0.0016                                       |
|                                    | [-0.2982, 0.0875]                           | [-0.0125, 0.0069]                            | [-0.1654, 0.2074]                           | [-0.0082, 0.0113]                            |

\*\*\*  $P < .001$ ; \*\*  $P < .01$ ; \*  $P < .05$ .

**eTable 3. Changes in outcome variables associated with the introduction and discontinuation of DRGs, excluding transition periods after policy changes**

|                                      | Introduction of DRGs                       |                                             | Discontinuation of DRGs                    |                                             |
|--------------------------------------|--------------------------------------------|---------------------------------------------|--------------------------------------------|---------------------------------------------|
|                                      | Step change estimated coefficients [95%CI] | Slope change estimated coefficients [95%CI] | Step change estimated coefficients [95%CI] | Slope change estimated coefficients [95%CI] |
| <b>Transition period: 6 months</b>   |                                            |                                             |                                            |                                             |
| Length of stay                       | -0.0255***<br>[-0.0321, -0.0189]           | 0.0013***<br>[0.0010, 0.0017]               | 0.0104**<br>[0.0040, 0.0168]               | 0.0026***<br>[0.0023, 0.0030]               |
| Average monthly admissions per month | 0.0418***<br>[0.0374, 0.0463]              | -0.0024***<br>[-0.0026, -0.0022]            | -0.0336***<br>[-0.0380, -0.0292]           | -0.0017***<br>[-0.0019, -0.0015]            |
| In-hospital mortality (%)            | -0.0302*<br>[-0.0561, -0.0043]             | -0.0003<br>[-0.0016, 0.0010]                | -0.0254<br>[-0.0518, 0.0010]               | 0.0039***<br>[0.0026, 0.0053]               |
| Emergency readmission (%)            | -0.0322***<br>[-0.0483, -0.0160]           | -0.0012**<br>[-0.0021, -0.0004]             | -0.0112<br>[-0.0269, 0.0045]               | 0.0003<br>[-0.0005, 0.0012]                 |
| <b>Transition period: 3 months</b>   |                                            |                                             |                                            |                                             |
| Length of stay                       | -0.0223***<br>[-0.0281, -0.0164]           | 0.0012***<br>[0.0009, 0.0015]               | 0.0086**<br>[0.0031, 0.0142]               | 0.0027***<br>[0.0024, 0.0030]               |
| Average monthly admissions per month | 0.0394***<br>[0.0354, 0.0435]              | -0.0023***<br>[-0.0025, -0.0021]            | -0.0271***<br>[-0.0309, -0.0233]           | -0.0020***<br>[-0.0022, -0.0018]            |
| In-hospital mortality (%)            | -0.0378**<br>[-0.0612, -0.0143]            | 0.0001<br>[-0.0011, 0.0012]                 | 0.0004<br>[-0.0004, 0.0011]                | 0.0038***<br>[0.0026, 0.0050]               |
| Emergency readmission (%)            | -0.0257***<br>[-0.0402, -0.0112]           | -0.0015***<br>[-0.0023, -0.0007]            | -0.0117<br>[-0.0254, 0.0021]               | 0.0004<br>[-0.0004, 0.0011]                 |
| <b>Transition period: 1 month</b>    |                                            |                                             |                                            |                                             |
| Length of stay                       | -0.0218***<br>[-0.0274, -0.0163]           | 0.0012***<br>[0.0009, 0.0015]               | 0.0069*<br>[0.0015, 0.0123]                | 0.0028***<br>[0.0025, 0.0031]               |
| Average monthly admissions per month | 0.0296***<br>[0.0258, 0.0335]              | -0.0018***<br>[-0.0020, -0.0017]            | -0.0143***<br>[-0.0180, -0.0107]           | -0.0027***<br>[-0.0029, -0.0025]            |
| In-hospital mortality (%)            | -0.0369**<br>[-0.0592, -0.0145]            | 0.0000<br>[-0.0011, 0.0012]                 | -0.0134<br>[-0.0352, 0.0084]               | 0.0032***<br>[0.0021, 0.0044]               |
| Emergency readmission (%)            | -0.0235***<br>[-0.0372, -0.0097]           | -0.0016***<br>[-0.0024, -0.0009]            | -0.0113<br>[-0.0240, 0.0015]               | 0.0004<br>[-0.0004, 0.0011]                 |

Note: A transition period was considered by excluding observations immediately after the dates of the policy changes. For example, when considering a 6-month transition period, we excluded 6 months of data after the policy changes in April 2009 and in April 2012, respectively.

\*\*\*  $P < .001$ ; \*\*  $P < .01$ ; \*  $P < .05$ .

**eTable 4. Changes in outcome variables associated with the introduction and discontinuation of DRGs, using alternative approaches to estimate patients' disease burden**

|                                                                            | Introduction of DRGs                        |                                              | Discontinuation of DRGs                     |                                              |
|----------------------------------------------------------------------------|---------------------------------------------|----------------------------------------------|---------------------------------------------|----------------------------------------------|
|                                                                            | Step change estimated coefficients [95% CI] | Slope change estimated coefficients [95% CI] | Step change estimated coefficients [95% CI] | Slope change estimated coefficients [95% CI] |
| <b>Charlson comorbidity index based on primary and secondary diagnoses</b> |                                             |                                              |                                             |                                              |
| Length of stay                                                             | -0.0162***<br>[-0.0224, -0.0099]            | 0.0017***<br>[0.0013, 0.0021]                | 0.0076**<br>[0.0020, 0.0131]                | 0.0025***<br>[0.0021, 0.0028]                |
| In-hospital mortality (%)                                                  | -0.0432***<br>[-0.0656, -0.0209]            | 0.0017**<br>[0.0005, 0.0029]                 | 0.0071<br>[-0.0143, 0.0286]                 | 0.0024***<br>[0.0013, 0.0036]                |
| Emergency readmission (%)                                                  | -0.0283***<br>[-0.0424, -0.0143]            | -0.0010*<br>[-0.0019, -0.0002]               | -0.0051<br>[-0.0180, 0.0077]                | -0.0003<br>[-0.0010, 0.0005]                 |
| <b>Whether the patient had a chronic disease</b>                           |                                             |                                              |                                             |                                              |
| Length of stay                                                             | -0.0165***<br>[-0.0229, -0.0101]            | 0.0017***<br>[0.0013, 0.0021]                | 0.0078**<br>[0.0022, 0.0135]                | 0.0025**<br>[0.0022, 0.0029]                 |
| In-hospital mortality (%)                                                  | -0.0198<br>[-0.0417, 0.0021]                | 0.0017**<br>[0.0006, 0.0028]                 | 0.0052<br>[-0.0160, 0.0264]                 | 0.0025***<br>[0.0013, 0.0036]                |
| Emergency readmission (%)                                                  | -0.0268***<br>[-0.0409, -0.0127]            | -0.0009*<br>[-0.0017, -0.0000]               | -0.0056<br>[-0.0185, 0.0073]                | 0.0005<br>[-0.0003, 0.0013]                  |

Note: In this sensitivity analysis, we used two alternative approaches to measuring disease burden rather than the Charlson comorbidity index based on primary diagnosis. First, we controlled for Charlson comorbidity index calculated based on both primary and secondary diagnoses. Second, we controlled for whether the patient had any chronic disease.

\*\*\*  $P < .001$ ; \*\*  $P < .01$ ; \*  $P < .05$ .

**eTable 5. Changes in volume of care associated with the introduction and discontinuation of DRGs, population number of admissions on mega-cluster level**

|                                      | Introduction of DRGs                        |                                              | Discontinuation of DRGs                     |                                              |
|--------------------------------------|---------------------------------------------|----------------------------------------------|---------------------------------------------|----------------------------------------------|
|                                      | Step change estimated coefficients [95% CI] | Slope change estimated coefficients [95% CI] | Step change estimated coefficients [95% CI] | Slope change estimated coefficients [95% CI] |
| Average monthly admissions per month | 0.0324***<br>[0.0284, 0.0364]               | -0.0021***<br>[-0.0023, -0.0019]             | -0.0145***<br>[-0.0182, -0.0108]            | -0.0020***<br>[-0.0022, -0.0019]             |

Note: The number of hospital admissions is counted at the mega-cluster level, which combines the existing 18 districts into 3 larger geographical groups—Hong Kong Island, Kowloon, and New Territories—to mitigate the cross-cluster movement of patients.

\*\*\*  $P < .001$ ; \*\*  $P < .01$ ; \*  $P < .05$ .
